# Supplementary material
Source: MDPI journal article supplement (https://www.mdpi.com/2073-4352/11/9/1039)
Supplement: s1 [file s1]

## Supplementary Materials

### A. Brief review of the structure types

The compounds with the perovskite, spinel, garnet, hexagonal perovskite, layered perovskite, -o-tp- perovskite, ilmenite, halite, and fluorite structures (Figure 1) were used to create different collections to develop the ANNs. Fluorite and halite are typical structures in  $AX_2$  and  $AX$  binary compounds, respectively. The characteristic polyhedron formed around cations in normal fluorite is the cube, whereas a tetrahedron is formed around anions. In antifluorite structure (formula  $XA_2$ ) the first coordination polyhedra are reversed, i.e., a cube of cations surrounds the anion, and a tetrahedron of anions surrounds the cation. In this article, we did not distinguish between fluorite or antifluorite compounds. In halite structure, counterions surround each other forming octahedral geometry.

In this article, we refer as perovskite structures to those compounds characterized only by a vertex-shared octahedral framework. This octahedral framework of the perovskite structure can be distorted, which is mainly due to rotations among octahedra. We refer to Ruddlesden-Popper and Dion-Jacobson structures as layered perovskites. In the layered perovskite, alternate phases between perovskite with halite or cesium chloride structure occur. Hexagonal perovskite compounds possess column-like structure. The columns consist of face-share octahedra. Additionally, there are polytypes in the hexagonal perovskite structure, wherein the columns are connected by octahedral vertices. These polytypes are consequence of alternate stacking of spheres layer in close packing fashion. -o-tp- perovskite compounds are similar to hexagonal perovskite: the column is formed by an alternate stacking of trigonal prisms and octahedra via face sharing. In all before mentioned structures, there is always an interstitial cation left in within the characteristic framework. Ilmenite, spinel, and garnet structures lack of interstitial cation.

Ilmenite structure is the structure of corundum,  $\alpha - Al_2O_3$ . In corundum, oxygen atoms adopt the hexagonal closest packing, wherein  $2/3$  of the octahedral sites are occupied by cations and the remaining  $1/3$  are vacant. These arrangement leads to face, vertex and edge sharing of the octahedra. Additionally, the anion (vertex) is four coordinated in the ilmenite structure. Spinel structure is characterized by vertex sharing of one tetrahedron a three octahedra; i.e., anion is four coordinated. The three octahedra are connected by edge-

sharing. Garnet structure also has four coordinated anions, which connect one tetrahedral cation, one octahedral cation and two eight-coordinated cations.

## B. Definitions of the structure types

In this part, each structure type is defined in terms of the occupied Wyckoff sites in each space group. The Wyckoff sites are pointed out with the labels corresponding to each space group. The different crystal descriptions for the same space groups are pointed out as option. These different descriptions in a space group may correspond to instances such as double or simple unit cell in perovskite compounds, polytypes in the hexagonal perovskites, or single – or double Ruddlesden-Popper or Dion Jacobson structures of layered perovskite compounds. The capital letter in each row refers to an atom type in the compound formula.

### 1. Fluorite structure

option: 0

Space group:  $Fm\bar{3}m$

A: d

option: 0

B: a

A: a

X: h

X: c

### 2. Garnet structure

option: 1

Space group:  $Ia\bar{3}d$

A: a,d

option: 0

B: f

D: c

X: g,h

O: a

option: 2

T: d

A: b, f

X: h

B: a, f

X: h, k

### 3. Halite structure

Space group:  $Fm\bar{3}m$

option: 3

option: 0

A: b,f,f

A: a

B: a,f,f

X: b

X: h,k,k

### 4. Hexagonal perovskite structure

Space group:  $P6_3mc$

Space group:  $P6_3/mmc$

option: 0

A: b

B: a

X: c

option: 1

A: a, b, b

B: a, b, b

X: c, c, c

Space group:  $P6_3cm$

option: 0

A: a, b

B: c

X: d, c

Space group:  $R\bar{3}m$

option: 0

A: a, c

B: b, c

X: e, h

## 5. Ilmenite structure

Space group:  $R\bar{3}$

option: 0

A: c

B: c

X: f

## 6. Layered perovskite structure

Space group:  $I4/mmm$

option: 0

A: e

B: a

X: e, c

option: 1

A: b, e

B: e

X: a, e, g

option: 2

A1: d

A2: a

B: e

X: b, e, g

option: 3

A1: d

A2: e

B: a, e

X: c, e, e, g

Space group:  $P4/nmm$

option: 0

A: c, c

B: c

X: a, c, f

Space group:  $P4/mmm$

option: 0

A1: d

A2: c

B: g

X: a, g, i

option: 1

A1: d

A2: h

B: a, g

X: f, g, g, i

Space group:  $Cmce$

option: 0

A: f

B: a

X: e, f

### 7. -o-tp- perovskite structure

Space group:  $R\bar{3}c$

option: 0

A1: e

A2: a

B: b

X: f

### 8. Perovskite structure

Space group:  $Pm\bar{3}m$

option: 0

A: b

B: a

X: d

Space group:  $P4/mbm$

option: 0

A: c

B: a

X: b, g

Space group:  $I4/mmm$

option: 0

A: a, b, c

B: f

X: h, n

Space group:  $Im\bar{3}$

option: 0

A: a, b

B: c

X: g

Space group:  $Immm$

option: 0

A: a,b,c,d

B: k

X: l, m, n

Space group:  $I4/mcm$

option: 0

A: b

B: c

X: a, h

Space group:  $Imma$

option: 0

A: e

B: b

X: e, g

Space group:  $R\bar{3}c$

option: 0

A: a

B: b

X: e

Space group:  $C2/m$

option: 0

A: i

B: e

X: i, g, h

option: 1

A: i

B1: a

B2: d

X: i, j

Space group:  $C2/c$

option: 0

A: e

B: b

X: e, f

option: 1

A: e, e

B1: c

B2: d

X: f, f, f

Space group:  $P\bar{1}$

option: 0

A: i

B: a, b

X: i, i, i

option: 1

A: i, i, i, i

B1: a, e, f, g

B2: b, c, d, h

X: i, i, i, i, i, i

Space group:  $Cmcm$

option: 0

A: c, c

B: d

X: e, f, g

Space group:  $Pnma$

option: 0

A: c

B: b

X: c, d

Space group:  $P2_1/m$

option: 0

A: e, e

B: b, c

X: e, e, f, f

Space group:  $P4_2/nmc$

option: 0

A: a, b, d

B: e

X: g, g, f

Space group:  $Pmmn$

option: 0

A: a, a, b, b

B: c, d

X: e, e, f, f, g

Space group:  $Pnnn$

option: 0

A: a, b, c, d

B1: e

B2: f

X: m, m, m

Space group:  $Pn\bar{3}$

option: 0

A: a, d

B1: b

B2: c

X: h

Space group:  $P2/c$

option: 0

A: e, e, f, f

B1: a, b

B2: c, d

X: g, g, g, g

Space group:  $P4_2/n$

option: 0

A : a, b, e

B1: c

B2: d

X: g, g, g

Space group:  $P2_1/c$

option: 0

A : e

B1: c

B2: d

X: e, e, e

Space group:  $R\bar{3}$

option: 0

A: c

B1: a

B2: b

X: f

Space group:  $P4_2/nnm$

option: 0

A: a, b, c

B1: e

B2: f

X: m, n

Space group:  $P4/mnc$

option: 0

A: c

B1: a

B2: b

X: e, h

Space group:  $I4/m$

option: 0

A: b

B1: a

B2: b

X: e, h

Space group:  $Fm\bar{3}m$

option: 0

A: c

B1: a

B2: b

X: e

## 9. Spinel structure

(In the 4S – ANNs, the space group  $Fd\bar{3}m$  was the only used).

Space group:  $Fd\bar{3}m$

option: 0

A: a

B: d

X: e

Space group:  $F\bar{4}3m$

option: 0

A1: a

A2: d

B: e

X: e, e

Space group:  $P4_332$

option: 0

A: c

B1: b

B2: d

X: c, e

Space group:  $P2_13$

option: 0

A: a, a

B1: a

B2: b

X: a, a, b, b

Space group:  $I4_1/amd$

option: 0

A: a

B: d

X: h

Space group:  $P4_322$

option: 0

A: c

B: a, b

X: d, d

Space group:  $P4_122$

option: 0

A: c

B1: a

B2: b

X: d, d

Space group:  $Imma$

option: 0

A: h

B: a, e, g

X: e, e, h, j



### C. Precisions with the compounds of the TRaining – VALidation set | Recall in the 2<sup>nd</sup> test

1. 4 sites, 4 outputs: garnet, perovskite, spinel and others.

|                     | Traval     |              |
|---------------------|------------|--------------|
|                     | No density | With density |
| <i>Garnet</i>       | 100.00     | 100.00       |
| <i>Perovskite</i>   | 95.93      | 97.39        |
| <i>Spinel</i>       | 97.80      | 98.34        |
| <i>Other phases</i> | 97.83      | 98.56        |
| Number of samples   | 4197       |              |

In case that the scores of the NEF – and WEF – ANN were different, the scores of the WEF – ANNs are shown in bold.

| 2 <sup>nd</sup> test: 12,264 not used compounds |                         |                        |                        |                        |
|-------------------------------------------------|-------------------------|------------------------|------------------------|------------------------|
|                                                 | 1                       | 2                      | 3                      | 4                      |
|                                                 | (1189)                  | (4306)                 | (3757)                 | (3012)                 |
| <i>Garnet</i>                                   | 0.00                    | 0.14 ( <b>0.00</b> )   | 0.00                   | 0.27 ( <b>0.20</b> )   |
| <i>Perovskite</i>                               | 0.00 ( <b>0.17</b> )    | 1.42 ( <b>3.37</b> )   | 2.45 ( <b>1.89</b> )   | 3.19 ( <b>2.95</b> )   |
| <i>Spinel</i>                                   | 0.00                    | 0.02 ( <b>2.42</b> )   | 1.14                   | 0.00                   |
| <i>Other phases</i>                             | 100.00 ( <b>99.83</b> ) | 98.42 ( <b>94.22</b> ) | 96.41 ( <b>96.97</b> ) | 96.55 ( <b>96.85</b> ) |

2. 6 sites, 4 outputs: garnet, perovskite, spinel, and other phases.

| Traval              |            |              |
|---------------------|------------|--------------|
|                     | No density | With density |
| <i>Garnet</i>       | 99.40      | 100.00       |
| <i>Perovskite</i>   | 95.28      | 96.21        |
| <i>Spinel</i>       | 96.53      | 97.67        |
| <i>Other phases</i> | 95.48      | 95.81        |
| Number of samples   | 4322       |              |

| 2 <sup>nd</sup> test |                          |                         |                         |                         |                         |                         |
|----------------------|--------------------------|-------------------------|-------------------------|-------------------------|-------------------------|-------------------------|
|                      | 1<br>(1189)              | 2<br>(4306)             | 3<br>(3711)             | 4<br>(3012)             | 5<br>(3557)             | 6<br>(3454)             |
| <i>Garnet</i>        | 0.00                     | 0.00                    | 0.00                    | 0.37<br><b>(0.27)</b>   | 0.00                    | 0.00                    |
| <i>Perovskite</i>    | 0.00<br><b>(0.08)</b>    | 0.81<br><b>(1.11)</b>   | 4.23<br><b>(3.96)</b>   | 3.45<br><b>(3.49)</b>   | 6.16<br><b>(7.59)</b>   | 7.47<br><b>(6.98)</b>   |
| <i>Spinel</i>        | 0.00                     | 1.86<br><b>(8.10)</b>   | 3.05<br><b>(2.32)</b>   | 0.03                    | 11.13<br><b>(8.52)</b>  | 0.00                    |
| <i>Other phases</i>  | 100.00<br><b>(99.92)</b> | 97.33<br><b>(90.78)</b> | 92.72<br><b>(93.72)</b> | 96.15<br><b>(96.22)</b> | 82.71<br><b>(83.89)</b> | 92.53<br><b>(93.02)</b> |

3. 6 sites, 8 output: garnet, hexagonal perovskite, ilmenite, layered perovskite, -o-tp-perovskite, perovskite, spinel, and others

| Traval                      |            |              |
|-----------------------------|------------|--------------|
|                             | No density | With density |
| <i>Garnet</i>               | 98.80      | 98.20        |
| <i>Hexagonal perovskite</i> | 93.20      | 89.62        |
| <i>Ilmenite</i>             | 76.19      | 74.47        |
| <i>Layered perovskite</i>   | 94.94      | 95.28        |
| <i>-o-tp perovskite</i>     | 94.03      | 98.31        |
| <i>Perovskite</i>           | 95.75      | 95.12        |
| <i>Spinel</i>               | 98.69      | 97.93        |
| <i>Other phases</i>         | 95.39      | 94.61        |
| Number of samples           | 5519       |              |

| 2 <sup>nd</sup> test        |                          |                         |                         |                         |                         |                         |
|-----------------------------|--------------------------|-------------------------|-------------------------|-------------------------|-------------------------|-------------------------|
|                             | 1<br>(1189)              | 2<br>(4306)             | 3<br>(3537)             | 4<br>(2504)             | 5<br>(3523)             | 6<br>(3120)             |
| <i>Garnet</i>               | 0.00                     | 0.00                    | 0.00                    | 0.28<br><b>(0.32)</b>   | 0.09<br><b>(0.00)</b>   | 0.00                    |
| <i>Hexagonal perovskite</i> | 0.00                     | 0.00                    | 0.20<br><b>(0.23)</b>   | 0.00                    | 3.46<br><b>(5.59)</b>   | 4.17<br><b>(4.26)</b>   |
| <i>Ilmenite</i>             | 0.00                     | 0.00                    | 0.57<br><b>(0.71)</b>   | 0.00                    | 0.00                    | 0.00                    |
| <i>Layered perovskite</i>   | 0.00                     | 0.00                    | 0.00                    | 0.56<br><b>(0.44)</b>   | 0.14<br><b>(0.00)</b>   | 1.51<br><b>(2.02)</b>   |
| <i>-o-tp perovskite</i>     | 0.00                     | 0.00                    | 0.00                    | 0.52<br><b>(0.40)</b>   | 0.00                    | 0.00                    |
| <i>Perovskite</i>           | 0.00<br><b>(0.17)</b>    | 0.37<br><b>(0.49)</b>   | 3.28<br><b>(4.04)</b>   | 2.64<br><b>(2.24)</b>   | 4.54<br><b>(3.75)</b>   | 3.24<br><b>(2.44)</b>   |
| <i>Spinel</i>               | 0.00                     | 2.02<br><b>(0.44)</b>   | 1.84<br><b>(2.01)</b>   | 0.00<br><b>(0.04)</b>   | 6.02<br><b>(5.31)</b>   | 0.03<br><b>(0.00)</b>   |
| <i>Other phases</i>         | 100.00<br><b>(99.83)</b> | 97.61<br><b>(99.07)</b> | 94.12<br><b>(93.02)</b> | 96.01<br><b>(96.57)</b> | 85.75<br><b>(85.35)</b> | 91.06<br><b>(91.28)</b> |

4. 6 sites, 10 outputs: fluorite, garnet, halite, hexagonal perovskite, ilmenite, layered perovskite, -o-tp- perovskite, perovskite, spinel, and others.

| <b>% Precision (traval)</b> |              |
|-----------------------------|--------------|
| Fluorite                    | 92.43 (191)  |
| Garnet                      | 97.63 (165)  |
| Halite                      | 89.98 (454)  |
| Hexagonal perovskite        | 96.00 (104)  |
| Ilmenite                    | 86.67 (44)   |
| Layered perovskite          | 95.47 (237)  |
| -o-tp- perovskite           | 96.92 (63)   |
| Perovskite                  | 96.63 (1383) |
| Spinel                      | 97.94 (764)  |
| Others                      | 96.45 (3398) |
| <i>Number of samples</i>    | <i>6803</i>  |

|                      | <b>1<br/>(1189)</b> | <b>2<br/>(2793)</b> | <b>3<br/>(3537)</b> | <b>4<br/>(2504)</b> | <b>5<br/>(3524)</b> | <b>6<br/>(3120)</b> |
|----------------------|---------------------|---------------------|---------------------|---------------------|---------------------|---------------------|
| Fluorite             | 2.78 (33)           | 4.19 (117)          | 0.00                | 0.00                | 0.00                | 0.00                |
| Garnet               | 0.00                | 0.00                | 0.00                | 0.36 (9)            | 0.00                | 0.00                |
| Halite               | 0.00                | 10.67 (298)         | 0.00                | 0.00                | 0.00                | 0.00                |
| Hexagonal perovskite | 0.00                | 0.00                | 0.25 (9)            | 0.00                | 3.69 (130)          | 2.37 (74)           |
| Ilmenite             | 0.00                | 0.00                | 0.42 (15)           | 0.00                | 0.00                | 0.00                |
| Layered perovskite   | 0.00                | 0.00                | 0.00                | 0.96 (24)           | 0.26 (9)            | 1.67 (52)           |
| -o-tp- perovskite    | 0.00                | 0.00                | 0.00                | 0.84 (21)           | 0.00                | 0.00                |
| Perovskite           | 0.00                | 0.00                | 2.97 (105)          | 3.31 (83)           | 5.51 (194)          | 2.53 (79)           |
| Spinel               | 0.00                | 0.00                | 2.23 (79)           | 0.00                | 5.99 (211)          | 0.00                |
| Others               | 97.22               | 85.14               | 94.12               | 94.53               | 84.56               | 93.43               |

## D. Retrieved compounds of the second test

| Hexagonal perovskites |       |       |                                                                                                                                                                                                                                                                                                                                                                                                                                                                                                                                                                                                                                                                                                                                                                                                                                                                                                                   |
|-----------------------|-------|-------|-------------------------------------------------------------------------------------------------------------------------------------------------------------------------------------------------------------------------------------------------------------------------------------------------------------------------------------------------------------------------------------------------------------------------------------------------------------------------------------------------------------------------------------------------------------------------------------------------------------------------------------------------------------------------------------------------------------------------------------------------------------------------------------------------------------------------------------------------------------------------------------------------------------------|
| Space group           | Sites | Atoms | Compounds                                                                                                                                                                                                                                                                                                                                                                                                                                                                                                                                                                                                                                                                                                                                                                                                                                                                                                         |
| $P6_3/mmc$            | 6     | 30    | Ba <sub>3</sub> NaRu <sub>2</sub> O <sub>9</sub> , Ba <sub>3</sub> YRu <sub>2</sub> O <sub>9</sub> , Ba <sub>3</sub> GdRu <sub>2</sub> O <sub>9</sub> , Ba <sub>6</sub> Fe <sub>3.98</sub> Te <sub>2.02</sub> O <sub>18</sub>                                                                                                                                                                                                                                                                                                                                                                                                                                                                                                                                                                                                                                                                                     |
|                       | 5     | 28    | Cs <sub>3</sub> W <sub>2</sub> Cl <sub>9</sub> , Cs <sub>3</sub> Tm <sub>2</sub> I <sub>9</sub> , Cs <sub>3</sub> Y <sub>2</sub> I <sub>9</sub> , Cs <sub>3</sub> Zr <sub>2</sub> I <sub>9</sub> , Rb <sub>3</sub> Nb <sub>2</sub> Br <sub>9</sub> , Cs <sub>3</sub> Er <sub>2</sub> I <sub>9</sub>                                                                                                                                                                                                                                                                                                                                                                                                                                                                                                                                                                                                               |
|                       | 5     | 20    | SrMnO <sub>3</sub>                                                                                                                                                                                                                                                                                                                                                                                                                                                                                                                                                                                                                                                                                                                                                                                                                                                                                                |
| $P\bar{6}m2$          | 6     | 30    | BaCoO <sub>3</sub>                                                                                                                                                                                                                                                                                                                                                                                                                                                                                                                                                                                                                                                                                                                                                                                                                                                                                                |
|                       | 5     | 10    | BaCoO <sub>3</sub>                                                                                                                                                                                                                                                                                                                                                                                                                                                                                                                                                                                                                                                                                                                                                                                                                                                                                                |
| $P6_322$              | 6     | 30    | Ba <sub>3</sub> Fe <sub>2</sub> WO <sub>9</sub>                                                                                                                                                                                                                                                                                                                                                                                                                                                                                                                                                                                                                                                                                                                                                                                                                                                                   |
| $P6_3/m$              | 6     | 30    | Ba <sub>6</sub> Sr <sub>0.4</sub> Ca <sub>1.6</sub> Ru <sub>4</sub> O <sub>18</sub> , Ba <sub>3</sub> SrNb <sub>2</sub> O <sub>9</sub> , Ba <sub>3</sub> SrTa <sub>2</sub> O <sub>9</sub> , Ba <sub>4</sub> Ta <sub>2</sub> O <sub>9</sub>                                                                                                                                                                                                                                                                                                                                                                                                                                                                                                                                                                                                                                                                        |
| $R\bar{3}m$           | 6     | 57    | Sr <sub>4</sub> Re <sub>2</sub> NiO <sub>12</sub> , Ba <sub>3</sub> LaZnReWO <sub>12</sub> , Sr <sub>3</sub> LaTa <sub>3</sub> O <sub>12</sub> , Ba <sub>4</sub> ScReWO <sub>12</sub>                                                                                                                                                                                                                                                                                                                                                                                                                                                                                                                                                                                                                                                                                                                             |
|                       | 5     | 42    | RbBa <sub>2</sub> Fe <sub>2</sub> F <sub>9</sub> , CsBa <sub>2</sub> Co <sub>2</sub> F <sub>9</sub> , KBa <sub>2</sub> Ni <sub>2</sub> F <sub>9</sub> , RbBa <sub>2</sub> Ni <sub>2</sub> F <sub>9</sub> , CsBa <sub>2</sub> Ni <sub>2</sub> F <sub>9</sub> , CsBa <sub>2</sub> Zn <sub>2</sub> F <sub>9</sub>                                                                                                                                                                                                                                                                                                                                                                                                                                                                                                                                                                                                    |
| Ilmenite              |       |       |                                                                                                                                                                                                                                                                                                                                                                                                                                                                                                                                                                                                                                                                                                                                                                                                                                                                                                                   |
| $R\bar{3}c$           | 3     | 30    | Ta <sub>4.002</sub> Mn <sub>7.998</sub> O <sub>18</sub> , Li <sub>5.64</sub> Nb <sub>5.88</sub> Zn <sub>0.48</sub> O <sub>18</sub> , Li <sub>6</sub> Nb <sub>6</sub> O <sub>12.006</sub> F <sub>5.994</sub> , Mn <sub>8.1</sub> Nb <sub>3.9</sub> O <sub>18</sub> , ScFeO <sub>3</sub> , AlBiO <sub>3</sub> , Li <sub>3.6</sub> Ta <sub>6</sub> Cu <sub>2.4</sub> O <sub>18</sub> , TiMnO <sub>3</sub> , Li <sub>5.25</sub> Nb <sub>5.25</sub> Te <sub>0.75</sub> O <sub>18</sub>                                                                                                                                                                                                                                                                                                                                                                                                                                 |
| Layered perovskites   |       |       |                                                                                                                                                                                                                                                                                                                                                                                                                                                                                                                                                                                                                                                                                                                                                                                                                                                                                                                   |
| $I4/mmm$              | 6     | 32    | CsBa <sub>2</sub> Cr <sub>2</sub> F <sub>11</sub>                                                                                                                                                                                                                                                                                                                                                                                                                                                                                                                                                                                                                                                                                                                                                                                                                                                                 |
|                       |       | 24    | Li <sub>3.92</sub> Y <sub>4</sub> Ti <sub>4</sub> S <sub>4</sub> O <sub>10</sub> , Li <sub>0.92</sub> Y <sub>4</sub> Ti <sub>4</sub> S <sub>4</sub> O <sub>10</sub> , Li <sub>0.6</sub> Y <sub>4</sub> Ti <sub>4</sub> S <sub>4</sub> O <sub>10</sub> , Ba <sub>3.964</sub> Ti <sub>4.016</sub> Cu <sub>1.988</sub> O <sub>12</sub>                                                                                                                                                                                                                                                                                                                                                                                                                                                                                                                                                                               |
|                       |       | 14    | Na <sub>0.2</sub> La <sub>7.8</sub> Ni <sub>4</sub> O <sub>16</sub>                                                                                                                                                                                                                                                                                                                                                                                                                                                                                                                                                                                                                                                                                                                                                                                                                                               |
| $P4/nmm$              | 6     | 14    | Sr <sub>0.82</sub> Ce <sub>0.54</sub> Nd <sub>2.64</sub> Cu <sub>2</sub> O <sub>7.8608</sub> , Sr <sub>0.5</sub> La <sub>2</sub> Ho <sub>1.5</sub> Cu <sub>2</sub> O <sub>7.78</sub>                                                                                                                                                                                                                                                                                                                                                                                                                                                                                                                                                                                                                                                                                                                              |
| $Immm$                | 4     | 12    | Ba <sub>2</sub> PdO <sub>3</sub> , Ce <sub>2</sub> MnN <sub>3</sub>                                                                                                                                                                                                                                                                                                                                                                                                                                                                                                                                                                                                                                                                                                                                                                                                                                               |
|                       |       | 11    | Li <sub>4</sub> WO <sub>6</sub>                                                                                                                                                                                                                                                                                                                                                                                                                                                                                                                                                                                                                                                                                                                                                                                                                                                                                   |
| $Fmmm$                | 4     | 28    | K <sub>4</sub> Br <sub>2</sub> O                                                                                                                                                                                                                                                                                                                                                                                                                                                                                                                                                                                                                                                                                                                                                                                                                                                                                  |
| $Ccce$                | 6     | 48    | K <sub>3</sub> Ag <sub>2</sub> F <sub>7</sub>                                                                                                                                                                                                                                                                                                                                                                                                                                                                                                                                                                                                                                                                                                                                                                                                                                                                     |
| $Cccm$                | 6     | 44    | Sr <sub>2</sub> MnBiPbO <sub>6</sub>                                                                                                                                                                                                                                                                                                                                                                                                                                                                                                                                                                                                                                                                                                                                                                                                                                                                              |
| $Cmce$                | 5     | 36    | Ba <sub>2</sub> CuF <sub>6</sub>                                                                                                                                                                                                                                                                                                                                                                                                                                                                                                                                                                                                                                                                                                                                                                                                                                                                                  |
| $Pbam$                | 4     | 14    | Sr <sub>2</sub> PrO <sub>4</sub> , Sr <sub>2</sub> PbO <sub>4</sub> , Ca <sub>2</sub> SnO <sub>4</sub> , Ca <sub>3.8</sub> Eu <sub>0.4</sub> Sn <sub>1.8</sub> O <sub>8</sub> , Ca <sub>3.4</sub> Eu <sub>1.2</sub> Sn <sub>1.4</sub> O <sub>8</sub> , Ca <sub>2</sub> PbO <sub>4</sub>                                                                                                                                                                                                                                                                                                                                                                                                                                                                                                                                                                                                                           |
| -o-tp perovskites     |       |       |                                                                                                                                                                                                                                                                                                                                                                                                                                                                                                                                                                                                                                                                                                                                                                                                                                                                                                                   |
| $R\bar{3}m$           | 4     | 33    | K <sub>4</sub> MnCl <sub>6</sub>                                                                                                                                                                                                                                                                                                                                                                                                                                                                                                                                                                                                                                                                                                                                                                                                                                                                                  |
| Perovskite            |       |       |                                                                                                                                                                                                                                                                                                                                                                                                                                                                                                                                                                                                                                                                                                                                                                                                                                                                                                                   |
| $Im\bar{3}m$          | 5     | 40    | K <sub>1.92</sub> Ba <sub>6.08</sub> Na <sub>1.262</sub> Bi <sub>6.738</sub> O <sub>24</sub> , K <sub>4</sub> CaU <sub>3</sub> O <sub>12</sub> , K <sub>4</sub> SrU <sub>3</sub> O <sub>12</sub> , K <sub>4</sub> BaU <sub>3</sub> O <sub>12</sub> , Ba <sub>4</sub> Na(SbO <sub>4</sub> ) <sub>3</sub> , Ba <sub>8</sub> Li <sub>1.98</sub> Sb <sub>6.02</sub> O <sub>24</sub> , Ba <sub>8</sub> Ca <sub>1.84</sub> Cu <sub>6</sub> O <sub>17.4</sub> , K <sub>6</sub> Ba <sub>2</sub> CaU <sub>6</sub> O <sub>24</sub>                                                                                                                                                                                                                                                                                                                                                                                          |
|                       | 4     | 40    | CaTi <sub>4</sub> (CuO <sub>4</sub> ) <sub>3</sub>                                                                                                                                                                                                                                                                                                                                                                                                                                                                                                                                                                                                                                                                                                                                                                                                                                                                |
|                       | 4     | 28    | Ca <sub>9.016</sub> B <sub>6</sub> N <sub>12</sub>                                                                                                                                                                                                                                                                                                                                                                                                                                                                                                                                                                                                                                                                                                                                                                                                                                                                |
| $Fd\bar{3}m$          | 4     | 84    | Na <sub>2</sub> Sr <sub>2</sub> Nb <sub>4</sub> O <sub>13</sub> , Eu <sub>10.72</sub> Ti <sub>16</sub> Fe <sub>5.28</sub> O <sub>50.72</sub> , Nd <sub>13.44</sub> Ti <sub>16</sub> O <sub>52.16</sub> , Na <sub>16</sub> Ta <sub>16.00</sub> O <sub>47.984</sub> , Ca <sub>10.4</sub> Re <sub>16</sub> O <sub>52.8</sub> , Na <sub>14.72</sub> Ta <sub>16</sub> O <sub>39.9984</sub> F <sub>8.0016</sub> , Na <sub>2.88</sub> Y <sub>6.88</sub> Sb <sub>16</sub> O <sub>51.76</sub> , Na <sub>2.88</sub> Gd <sub>6.4</sub> Sb <sub>16</sub> O <sub>51.04</sub> , K <sub>3.36</sub> Gd <sub>5.6</sub> Sb <sub>16</sub> O <sub>50.08</sub>                                                                                                                                                                                                                                                                         |
|                       | 3     | 80    | SnPbO <sub>3</sub> , Nb <sub>2</sub> CdO <sub>7</sub> , Ta <sub>2</sub> CdO <sub>7</sub> , Nb <sub>2</sub> PbO <sub>7</sub> , KTaWO <sub>7</sub> , MnRe(PbO <sub>3</sub> ) <sub>2</sub> , Ta <sub>12.8</sub> Ti <sub>3.2</sub> Pb <sub>9.6</sub> O <sub>48</sub> , Ta <sub>2</sub> PbO <sub>7</sub> , NaSbO <sub>3</sub> , AgSbO <sub>3</sub> , K <sub>2.576</sub> Ag <sub>13.424</sub> Sb <sub>16</sub> O <sub>48</sub> , Nb <sub>8</sub> Cr <sub>8</sub> Bi <sub>10.72</sub> O <sub>48</sub> , SbWNO <sub>6</sub> , TaWNO <sub>6</sub> , W <sub>2</sub> O <sub>7</sub> , NbWNO <sub>6</sub> , Nb <sub>2</sub> O <sub>7</sub> , Ta <sub>2</sub> O <sub>7</sub> , Ta <sub>11.2</sub> W <sub>4.8</sub> O <sub>56</sub> , TaWO <sub>7</sub> , Al <sub>8</sub> (O <sub>5</sub> F <sub>4</sub> ) <sub>3</sub> , Ta <sub>8</sub> W <sub>8</sub> O <sub>50.16</sub> , Nb <sub>8</sub> W <sub>8</sub> O <sub>48.56</sub> |
| $Fm\bar{3}m$          | 5     | 64    | K <sub>2</sub> FeCu(CN) <sub>6</sub> , K <sub>2</sub> FeNi(CN) <sub>6</sub> , K <sub>2</sub> FeCo(CN) <sub>6</sub> , KFe(CN) <sub>3</sub> , Rb <sub>2</sub> FeCu(CN) <sub>6</sub>                                                                                                                                                                                                                                                                                                                                                                                                                                                                                                                                                                                                                                                                                                                                 |
|                       | 3     | 36    | Cs <sub>2</sub> SiF <sub>6</sub> , Cs <sub>2</sub> GeF <sub>6</sub> , Sr <sub>2</sub> H <sub>6</sub> Ru, Cs <sub>2</sub> PdF <sub>6</sub> , Rb <sub>2</sub> PdF <sub>6</sub> , NaPF <sub>6</sub> , HfVF <sub>6</sub> , ZrTiF <sub>6</sub> , NaMoF <sub>6</sub> , CaPbF <sub>6</sub> , NaSbF <sub>6</sub>                                                                                                                                                                                                                                                                                                                                                                                                                                                                                                                                                                                                          |
| $Pm\bar{3}m$          | 4     | 8     | CaTiO <sub>3</sub>                                                                                                                                                                                                                                                                                                                                                                                                                                                                                                                                                                                                                                                                                                                                                                                                                                                                                                |
| $F\bar{4}3m$          | 5     | 40    | KBaLiZnF <sub>6</sub>                                                                                                                                                                                                                                                                                                                                                                                                                                                                                                                                                                                                                                                                                                                                                                                                                                                                                             |
| $Pa\bar{3}$           | 4     | 40    | Ba <sub>2</sub> UCrO <sub>6</sub> , Ba <sub>8</sub> Mg <sub>2</sub> U <sub>3.332</sub> Fe <sub>2.668</sub> O <sub>24</sub> , K <sub>2</sub> NaAlF <sub>6</sub> , Ba <sub>8</sub> U <sub>2.668</sub> In <sub>0.532</sub> Fe <sub>4.8</sub> O <sub>24</sub> , Ba <sub>8</sub> U <sub>2.668</sub> In <sub>0.268</sub> Fe <sub>5.064</sub> O <sub>24</sub> , Ba <sub>8</sub> U <sub>2.668</sub> In <sub>1.064</sub> Fe <sub>4.268</sub> O <sub>24</sub> , Ba <sub>8</sub> U <sub>2.668</sub> In <sub>1.332</sub> Fe <sub>4</sub> O <sub>24</sub> , Sr <sub>8</sub> Sc <sub>2</sub> Al <sub>6</sub> O <sub>19.9992</sub>                                                                                                                                                                                                                                                                                               |
| $R\bar{3}c$           | 3     | 30    | Sr <sub>0.32</sub> La <sub>1.68</sub> Mn <sub>2</sub> O <sub>6</sub>                                                                                                                                                                                                                                                                                                                                                                                                                                                                                                                                                                                                                                                                                                                                                                                                                                              |

|              |   |    |                                                                                                                                                                                                                                                                                                                                                                                                                                                                                                                                                                                                                                                                                                                                                                                                                                                                                                                                                                                                                                                                                                                                                                                                                                                                                                                                                                                                                                                                                                                                                                                                                                                                                                                                  |
|--------------|---|----|----------------------------------------------------------------------------------------------------------------------------------------------------------------------------------------------------------------------------------------------------------------------------------------------------------------------------------------------------------------------------------------------------------------------------------------------------------------------------------------------------------------------------------------------------------------------------------------------------------------------------------------------------------------------------------------------------------------------------------------------------------------------------------------------------------------------------------------------------------------------------------------------------------------------------------------------------------------------------------------------------------------------------------------------------------------------------------------------------------------------------------------------------------------------------------------------------------------------------------------------------------------------------------------------------------------------------------------------------------------------------------------------------------------------------------------------------------------------------------------------------------------------------------------------------------------------------------------------------------------------------------------------------------------------------------------------------------------------------------|
| $R\bar{3}m$  | 4 | 30 | Ba <sub>2</sub> SrIrO <sub>6</sub> , Ba <sub>2</sub> Ca <sub>0.7333</sub> Nb <sub>1.2667</sub> O <sub>5.8998</sub> , Ba <sub>2</sub> Ca <sub>0.7867</sub> Nb <sub>1.2133</sub> O <sub>5.823</sub> , Ba <sub>2</sub> Ca <sub>0.8333</sub> Nb <sub>1.1667</sub> O <sub>5.7498</sub> , Ba <sub>2</sub> Ca <sub>0.9</sub> Nb <sub>1.1</sub> O <sub>5.6502</sub>                                                                                                                                                                                                                                                                                                                                                                                                                                                                                                                                                                                                                                                                                                                                                                                                                                                                                                                                                                                                                                                                                                                                                                                                                                                                                                                                                                      |
|              | 3 | 24 | BaGeF <sub>6</sub> , KAuF <sub>6</sub> , BaCrF <sub>6</sub> , SrCrF <sub>6</sub> , CaTiF <sub>6</sub> , BaPbF <sub>6</sub> , SrNiF <sub>6</sub>                                                                                                                                                                                                                                                                                                                                                                                                                                                                                                                                                                                                                                                                                                                                                                                                                                                                                                                                                                                                                                                                                                                                                                                                                                                                                                                                                                                                                                                                                                                                                                                  |
| $P\bar{3}m1$ | 3 | 9  | K <sub>2</sub> PdF <sub>6</sub>                                                                                                                                                                                                                                                                                                                                                                                                                                                                                                                                                                                                                                                                                                                                                                                                                                                                                                                                                                                                                                                                                                                                                                                                                                                                                                                                                                                                                                                                                                                                                                                                                                                                                                  |
| $P\bar{3}1m$ | 3 | 9  | Li <sub>2</sub> HfF <sub>6</sub> , Li <sub>2</sub> ZrF <sub>6</sub>                                                                                                                                                                                                                                                                                                                                                                                                                                                                                                                                                                                                                                                                                                                                                                                                                                                                                                                                                                                                                                                                                                                                                                                                                                                                                                                                                                                                                                                                                                                                                                                                                                                              |
| $R3c$        | 3 | 30 | K <sub>0.6</sub> Na <sub>2.4</sub> Ti <sub>6</sub> Bi <sub>3</sub> O <sub>18</sub> , K <sub>1.2</sub> Na <sub>1.8</sub> Ti <sub>6</sub> Bi <sub>3</sub> O <sub>18</sub> , Sr <sub>0.3</sub> La <sub>5.7</sub> Mg <sub>0.6</sub> Ga <sub>5.4</sub> O <sub>17.46</sub>                                                                                                                                                                                                                                                                                                                                                                                                                                                                                                                                                                                                                                                                                                                                                                                                                                                                                                                                                                                                                                                                                                                                                                                                                                                                                                                                                                                                                                                             |
| $R3m$        | 3 | 15 | Ta <sub>1.5</sub> Fe <sub>1.5</sub> Pb <sub>3</sub> O <sub>9</sub> , Ba <sub>3</sub> Ta <sub>1.5</sub> Fe <sub>1.5</sub> O <sub>9</sub> , Ba <sub>2</sub> TaFeO <sub>6</sub> , Nb <sub>0.5</sub> Fe <sub>0.5</sub> Pb <sub>1</sub> O <sub>3</sub> , Zr <sub>0.58</sub> Ti <sub>0.42</sub> Pb <sub>1</sub> O <sub>3</sub> , BaTiO <sub>3</sub>                                                                                                                                                                                                                                                                                                                                                                                                                                                                                                                                                                                                                                                                                                                                                                                                                                                                                                                                                                                                                                                                                                                                                                                                                                                                                                                                                                                    |
| $R\bar{3}$   | 3 | 24 | NaFeF <sub>6</sub> , MgCrF <sub>6</sub> , LiBiF <sub>6</sub> , RbBiF <sub>6</sub> , CsBiF <sub>6</sub> , TiCdF <sub>6</sub> , CsSbF <sub>6</sub> , CsReF <sub>6</sub> , LiIrF <sub>6</sub> , CaPtF <sub>6</sub> , MnPtF <sub>6</sub> , CaPdF <sub>6</sub> , CsBrF <sub>6</sub> , CsUF <sub>6</sub> , ZnPdF <sub>6</sub> , CdPdF <sub>6</sub>                                                                                                                                                                                                                                                                                                                                                                                                                                                                                                                                                                                                                                                                                                                                                                                                                                                                                                                                                                                                                                                                                                                                                                                                                                                                                                                                                                                     |
| $I4/mcm$     | 4 | 20 | KCuF <sub>3</sub>                                                                                                                                                                                                                                                                                                                                                                                                                                                                                                                                                                                                                                                                                                                                                                                                                                                                                                                                                                                                                                                                                                                                                                                                                                                                                                                                                                                                                                                                                                                                                                                                                                                                                                                |
| $I4/mmm$     | 5 | 20 | CsAuCl <sub>3</sub> , Cs <sub>2</sub> AgAuCl <sub>6</sub> , CsAgCl <sub>3</sub> , Ba <sub>2</sub> FeReO <sub>6</sub> , Cs <sub>2</sub> KMnF <sub>6</sub> , Sr <sub>2</sub> FeMoO <sub>6</sub> , Cs <sub>3</sub> TiF <sub>6</sub> , Sr <sub>4</sub> Fe <sub>2.2</sub> Mo <sub>1.8</sub> O <sub>12</sub> , Sr <sub>4</sub> Fe <sub>1.6</sub> Mo <sub>2.4</sub> O <sub>12</sub> , Rb <sub>2</sub> NaMnF <sub>6</sub> , Sr <sub>2</sub> MgReO <sub>6</sub> , Cs <sub>2</sub> HgPdCl <sub>6</sub> , CoTe(PbO <sub>3</sub> ) <sub>2</sub> , CsAuI <sub>3</sub> , CsAuBr <sub>3</sub> , Ba <sub>2</sub> SmMoO <sub>6</sub>                                                                                                                                                                                                                                                                                                                                                                                                                                                                                                                                                                                                                                                                                                                                                                                                                                                                                                                                                                                                                                                                                                              |
| $P4/mmm$     | 6 | 10 | Ba <sub>2</sub> Sc <sub>1</sub> Cu <sub>1</sub> O <sub>4.5</sub> , Ba <sub>2</sub> Cu <sub>1</sub> Hg <sub>1</sub> O <sub>4.34</sub> , Ba <sub>2</sub> Cu <sub>1</sub> Hg <sub>0.98</sub> O <sub>4.34</sub> , Ba <sub>2</sub> Cu <sub>1</sub> Hg <sub>1</sub> O <sub>4.31</sub> , Ba <sub>2</sub> Cu <sub>1</sub> Hg <sub>0.96</sub> O <sub>4.34</sub> , Ba <sub>2</sub> Cu <sub>1</sub> Hg <sub>1</sub> O <sub>4.27</sub> , Ba <sub>2</sub> Cu <sub>1</sub> Hg <sub>1</sub> O <sub>4.24</sub> , Ba <sub>2</sub> Cu <sub>1</sub> Hg <sub>1</sub> O <sub>4.172</sub> , Ba <sub>2</sub> Ce <sub>0.15</sub> Cu <sub>1</sub> Hg <sub>0.85</sub> O <sub>4.15</sub> , Ba <sub>2</sub> Cu <sub>1</sub> Hg <sub>1</sub> O <sub>4.12</sub> , Ba <sub>2</sub> Cu <sub>1</sub> Hg <sub>1</sub> O <sub>4.1</sub> , Ba <sub>2</sub> Cu <sub>1</sub> Hg <sub>1</sub> O <sub>4.069</sub> , Ba <sub>2</sub> Cu <sub>1</sub> Hg <sub>1</sub> O <sub>4.054</sub>                                                                                                                                                                                                                                                                                                                                                                                                                                                                                                                                                                                                                                                                                                                                                                                   |
|              | 5 | 9  | Li <sub>0.5</sub> La <sub>0.5</sub> Nb <sub>2</sub> O <sub>6</sub> , Li <sub>0.32</sub> La <sub>0.56</sub> Nb <sub>2</sub> O <sub>6</sub> , Li <sub>0.08</sub> La <sub>0.64</sub> Nb <sub>2</sub> O <sub>6</sub> , La <sub>0.667</sub> Nb <sub>2</sub> O <sub>6</sub> , La <sub>0.66</sub> Ta <sub>2</sub> O <sub>6</sub> , Y <sub>1.32</sub> Ta <sub>4</sub> O <sub>12</sub> , Y <sub>0.6</sub> Ta <sub>1.8</sub> W <sub>0.2</sub> O <sub>6</sub> , U <sub>0.5</sub> Nb <sub>2</sub> O <sub>6</sub>                                                                                                                                                                                                                                                                                                                                                                                                                                                                                                                                                                                                                                                                                                                                                                                                                                                                                                                                                                                                                                                                                                                                                                                                                             |
|              | 4 | 10 | Sr <sub>1</sub> Ca <sub>1</sub> Cu <sub>1.5</sub> Bi <sub>0.5</sub> O <sub>4</sub>                                                                                                                                                                                                                                                                                                                                                                                                                                                                                                                                                                                                                                                                                                                                                                                                                                                                                                                                                                                                                                                                                                                                                                                                                                                                                                                                                                                                                                                                                                                                                                                                                                               |
| $P4bm$       | 4 | 10 | NaTi <sub>2</sub> BiO <sub>6</sub>                                                                                                                                                                                                                                                                                                                                                                                                                                                                                                                                                                                                                                                                                                                                                                                                                                                                                                                                                                                                                                                                                                                                                                                                                                                                                                                                                                                                                                                                                                                                                                                                                                                                                               |
| $P4mm$       | 6 | 20 | Nd <sub>3</sub> Ta <sub>4</sub> O <sub>12</sub>                                                                                                                                                                                                                                                                                                                                                                                                                                                                                                                                                                                                                                                                                                                                                                                                                                                                                                                                                                                                                                                                                                                                                                                                                                                                                                                                                                                                                                                                                                                                                                                                                                                                                  |
|              | 5 | 5  | Hf <sub>0.42</sub> Ti <sub>0.58</sub> Pb <sub>1</sub> O <sub>3</sub> , Ba <sub>0.3</sub> Fe <sub>1</sub> Bi <sub>0.7</sub> O <sub>2.7</sub> F <sub>0.3</sub> , Ba <sub>0.2</sub> Fe <sub>1</sub> Bi <sub>0.8</sub> O <sub>2.799</sub> F <sub>0.201</sub> , Sr <sub>0.06</sub> Zr <sub>0.5</sub> Ti <sub>0.5</sub> Pb <sub>0.91</sub> O <sub>3</sub> , Ba <sub>0.2</sub> Fe <sub>1</sub> Bi <sub>0.8</sub> O <sub>2.9001</sub> , Ba <sub>0.3</sub> Fe <sub>1</sub> Bi <sub>0.7</sub> O <sub>2.85</sub>                                                                                                                                                                                                                                                                                                                                                                                                                                                                                                                                                                                                                                                                                                                                                                                                                                                                                                                                                                                                                                                                                                                                                                                                                            |
|              | 4 | 5  | Mg <sub>0.213</sub> Ti <sub>0.36</sub> Nb <sub>0.427</sub> Pb <sub>1</sub> O <sub>3</sub> , Mg <sub>0.227</sub> Ti <sub>0.32</sub> Nb <sub>0.453</sub> Pb <sub>1</sub> O <sub>3</sub> , Mg <sub>0.237</sub> Ti <sub>0.29</sub> Nb <sub>0.473</sub> Pb <sub>1</sub> O <sub>3</sub> , Mg <sub>0.203</sub> Ti <sub>0.39</sub> Nb <sub>0.407</sub> Pb <sub>1</sub> O <sub>3</sub> , Zr <sub>0.1</sub> Ti <sub>0.9</sub> Pb <sub>1</sub> O <sub>3</sub> , Zr <sub>0.52</sub> Ti <sub>0.48</sub> Pb <sub>1</sub> O <sub>3</sub> , TiPbO <sub>3</sub> , Hf <sub>0.2</sub> Ti <sub>0.8</sub> Pb <sub>1</sub> O <sub>3</sub> , Zr <sub>0.44</sub> Ti <sub>0.44</sub> Mn <sub>0.04</sub> Nb <sub>0.04</sub> Ni <sub>0.04</sub> Pb <sub>1</sub> O <sub>3</sub> , Zr <sub>0.525</sub> Ti <sub>0.475</sub> Pb <sub>1</sub> O <sub>3</sub> , Zr <sub>0.45</sub> Ti <sub>0.55</sub> Pb <sub>1</sub> O <sub>3</sub> , Zr <sub>0.945</sub> Ti <sub>0.029</sub> Nb <sub>0.026</sub> Pb <sub>0.987</sub> O <sub>3</sub> , Ca <sub>0.42</sub> Ti <sub>1</sub> Pb <sub>0.58</sub> O <sub>3</sub> , Ca <sub>0.388</sub> Ti <sub>1</sub> Pb <sub>0.612</sub> O <sub>3</sub> , Zr <sub>0.45</sub> Ti <sub>0.55</sub> Pb <sub>1</sub> O <sub>3</sub> , ZrPbO <sub>3</sub> , Zr <sub>0.945</sub> Ti <sub>0.029</sub> Nb <sub>0.026</sub> Pb <sub>0.987</sub> O <sub>3</sub> , Ti <sub>1</sub> Pb <sub>0.9926</sub> O <sub>2.9342</sub> , Ti <sub>1</sub> Pb <sub>0.9633</sub> O <sub>2.6098</sub> , Ti <sub>0.962</sub> Pb <sub>0.9909</sub> O <sub>2.9794</sub> , Ti <sub>0.984</sub> Pb <sub>0.9923</sub> O <sub>2.9426</sub> , Ti <sub>0.96</sub> Pb <sub>0.9844</sub> O <sub>2.96</sub> , Ti <sub>0.964</sub> Pb <sub>0.9981</sub> O <sub>2.8972</sub> |
| $I4/m$       | 5 | 20 | BaLaMgRuO <sub>6</sub> , BaLaZnRuO <sub>6</sub> , Ba <sub>2</sub> CuWO <sub>6</sub> , Sr <sub>2</sub> CuWO <sub>6</sub> , Sr <sub>2</sub> CuTeO <sub>6</sub> , Ba <sub>2</sub> CuTeO <sub>6</sub> , BaLaCuRuO <sub>6</sub> , Sr <sub>2</sub> NiWO <sub>6</sub> , Sr <sub>2</sub> FeMoO <sub>6</sub> , Sr <sub>3.8</sub> Nd <sub>0.2</sub> Fe <sub>2</sub> Mo <sub>2</sub> O <sub>12</sub> , Sr <sub>2</sub> MnSbO <sub>6</sub> , Ba <sub>2</sub> GdNbO <sub>6</sub> , Ba <sub>2</sub> TbNbO <sub>6</sub> , Ba <sub>2</sub> CaWO <sub>6</sub> , Ba <sub>2</sub> CaReO <sub>6</sub> , Sr <sub>4</sub> V <sub>0.5</sub> Fe <sub>1.5</sub> Mo <sub>2.0</sub> O <sub>12</sub> , KRb <sub>2</sub> InF <sub>6</sub> , Ba <sub>2</sub> FeWO <sub>6</sub> , Sr <sub>2</sub> TaInO <sub>6</sub> , Sr <sub>2</sub> TaGaO <sub>6</sub> , Sr <sub>2</sub> ReNiO <sub>6</sub> , Sr <sub>2</sub> CoReO <sub>6</sub> , Sr <sub>2</sub> ZnReO <sub>6</sub> , Sr <sub>2</sub> NiMoO <sub>6</sub> , Ba <sub>2</sub> YTbO <sub>6</sub> , Sr <sub>4</sub> Fe <sub>2.94</sub> Te <sub>1.06</sub> O <sub>12</sub> , Sr <sub>4</sub> Fe <sub>1.98</sub> Mo <sub>1.98</sub> O <sub>12</sub> , Sr <sub>4</sub> Ti <sub>0.5</sub> Fe <sub>1.48</sub> Mo <sub>1.96</sub> O <sub>12</sub> , Sr <sub>4</sub> Cr <sub>0.5</sub> Fe <sub>1.5</sub> Mo <sub>2</sub> O <sub>11.796</sub> , Sr <sub>4</sub> Fe <sub>1.94</sub> Mo <sub>1.88</sub> O <sub>11.616</sub> , Sr <sub>3.82</sub> Fe <sub>1.5</sub> Co <sub>0.5</sub> Mo <sub>2</sub> O <sub>11.364</sub>                                                                                                                                                                                                  |
| $Imma$       | 4 | 20 | SrNdMn <sub>2</sub> O <sub>6</sub> , Ba <sub>1.0912</sub> Sr <sub>2.9088</sub> Zr <sub>2.624</sub> Ti <sub>1.376</sub> O <sub>12</sub> , Sr <sub>2</sub> Nd <sub>0.25</sub> Sm <sub>1.75</sub> Mn <sub>4</sub> O <sub>12</sub> , Ba <sub>4</sub> Bi(PbO <sub>4</sub> ) <sub>3</sub> , BaLaMnInO <sub>6</sub> , Na <sub>1.32</sub> La <sub>2.66</sub> Ti <sub>2.68</sub> Mn <sub>1.32</sub> O <sub>12</sub> , Sr <sub>0.2</sub> La <sub>3.8</sub> Mg <sub>0.428</sub> Ga <sub>3.572</sub> O <sub>11.1612</sub>                                                                                                                                                                                                                                                                                                                                                                                                                                                                                                                                                                                                                                                                                                                                                                                                                                                                                                                                                                                                                                                                                                                                                                                                                    |
| $Pnma$       | 5 | 20 | Mg <sub>3.9</sub> Al <sub>0.2</sub> Si <sub>3.9</sub> O <sub>12</sub>                                                                                                                                                                                                                                                                                                                                                                                                                                                                                                                                                                                                                                                                                                                                                                                                                                                                                                                                                                                                                                                                                                                                                                                                                                                                                                                                                                                                                                                                                                                                                                                                                                                            |
| $Pbam$       | 6 | 20 | Sr <sub>3.6</sub> La <sub>0.4</sub> Mn <sub>4</sub> O <sub>10.2</sub>                                                                                                                                                                                                                                                                                                                                                                                                                                                                                                                                                                                                                                                                                                                                                                                                                                                                                                                                                                                                                                                                                                                                                                                                                                                                                                                                                                                                                                                                                                                                                                                                                                                            |
| $Pmmm$       | 5 | 5  | TiPbO <sub>3</sub>                                                                                                                                                                                                                                                                                                                                                                                                                                                                                                                                                                                                                                                                                                                                                                                                                                                                                                                                                                                                                                                                                                                                                                                                                                                                                                                                                                                                                                                                                                                                                                                                                                                                                                               |
| $Am2$        | 5 | 10 | K <sub>1.7156</sub> Na <sub>0.2844</sub> Nb <sub>2</sub> O <sub>5.612</sub> , K <sub>1.6786</sub> Na <sub>0.3214</sub> Nb <sub>2</sub> O <sub>5.612</sub>                                                                                                                                                                                                                                                                                                                                                                                                                                                                                                                                                                                                                                                                                                                                                                                                                                                                                                                                                                                                                                                                                                                                                                                                                                                                                                                                                                                                                                                                                                                                                                        |
|              | 4 | 10 | KNbO <sub>3</sub> , K <sub>1.4032</sub> Na <sub>0.5968</sub> Nb <sub>1</sub> O <sub>6</sub> , K <sub>1.5238</sub> Na <sub>0.4762</sub> Nb <sub>1</sub> O <sub>6</sub> , K <sub>1.5098</sub> Na <sub>0.49</sub> Nb <sub>1</sub> O <sub>6</sub> , K <sub>1.45</sub> Na <sub>0.55</sub> Nb <sub>1</sub> O <sub>6</sub>                                                                                                                                                                                                                                                                                                                                                                                                                                                                                                                                                                                                                                                                                                                                                                                                                                                                                                                                                                                                                                                                                                                                                                                                                                                                                                                                                                                                              |
| $C2/m$       | 6 | 20 | KCrF <sub>3</sub>                                                                                                                                                                                                                                                                                                                                                                                                                                                                                                                                                                                                                                                                                                                                                                                                                                                                                                                                                                                                                                                                                                                                                                                                                                                                                                                                                                                                                                                                                                                                                                                                                                                                                                                |

|                           |   |    |                                                                                                                                                                                                                                                                                                                                                                                                                                                                                                                                                                                                                                                                                                                                                                                        |
|---------------------------|---|----|----------------------------------------------------------------------------------------------------------------------------------------------------------------------------------------------------------------------------------------------------------------------------------------------------------------------------------------------------------------------------------------------------------------------------------------------------------------------------------------------------------------------------------------------------------------------------------------------------------------------------------------------------------------------------------------------------------------------------------------------------------------------------------------|
| <i>Cm</i>                 | 5 | 10 | Zr <sub>1.08</sub> Ti <sub>0.92</sub> Pb <sub>2</sub> O <sub>6</sub> , Zr <sub>1.04</sub> Ti <sub>0.96</sub> Pb <sub>2</sub> O <sub>6</sub>                                                                                                                                                                                                                                                                                                                                                                                                                                                                                                                                                                                                                                            |
|                           | 4 | 10 | NbFe(PbO <sub>3</sub> ) <sub>2</sub>                                                                                                                                                                                                                                                                                                                                                                                                                                                                                                                                                                                                                                                                                                                                                   |
| <i>Pm</i>                 | 5 | 5  | Mg <sub>0.213</sub> Ti <sub>0.36</sub> Nb <sub>0.427</sub> Pb <sub>1</sub> O <sub>3</sub> , Mg <sub>0.227</sub> Ti <sub>0.32</sub> Nb <sub>0.453</sub> Pb <sub>1</sub> O <sub>3</sub> , KNbO <sub>3</sub>                                                                                                                                                                                                                                                                                                                                                                                                                                                                                                                                                                              |
| <b>Spinel</b>             |   |    |                                                                                                                                                                                                                                                                                                                                                                                                                                                                                                                                                                                                                                                                                                                                                                                        |
| <i>I4<sub>1</sub>/amd</i> | 3 | 28 | Mn <sub>3</sub> O <sub>4</sub> , Cu <sub>2</sub> GeO <sub>4</sub> , MgMn <sub>2</sub> O <sub>4</sub> , Mn <sub>8.196</sub> Co <sub>0.76</sub> Cu <sub>0.36</sub> Ni <sub>2.684</sub> O <sub>16</sub> , Mn <sub>2</sub> CuO <sub>4</sub> , Cr <sub>2</sub> NiO <sub>4</sub> , Cr <sub>2</sub> CuO <sub>4</sub> , Cu(RhO <sub>2</sub> ) <sub>2</sub> , Li <sub>3.628</sub> Mn <sub>8.372</sub> O <sub>16</sub> , Fe <sub>2</sub> SnS <sub>4</sub> , Mn <sub>8.344</sub> Co <sub>3.656</sub> O <sub>16</sub> , Mn <sub>11.752</sub> Fe <sub>0.248</sub> O <sub>16</sub> , Mn <sub>10.812</sub> Fe <sub>1.188</sub> O <sub>16</sub> , Fe <sub>2</sub> CuO <sub>4</sub> , Mn <sub>8.0004</sub> Ni <sub>3.9996</sub> O <sub>16</sub> , Li <sub>3.56</sub> Mn <sub>8</sub> O <sub>15.36</sub> |
| <i>Imma</i>               | 5 | 28 | LiVCuO <sub>4</sub> , Li <sub>2.196</sub> V <sub>4.02</sub> Co <sub>4.956</sub> O <sub>16</sub>                                                                                                                                                                                                                                                                                                                                                                                                                                                                                                                                                                                                                                                                                        |
| <i>Fddd</i>               | 3 | 56 | Na <sub>2</sub> SO <sub>4</sub> , Na <sub>2</sub> SeO <sub>4</sub> , Hg <sub>2</sub> GeO <sub>4</sub> , AgHgAsO <sub>4</sub> , Ag <sub>2</sub> SeO <sub>4</sub> , Cr <sub>2</sub> SiO <sub>4</sub>                                                                                                                                                                                                                                                                                                                                                                                                                                                                                                                                                                                     |
| <i>C2/c</i>               | 5 | 28 | Li <sub>2</sub> CrCl <sub>4</sub>                                                                                                                                                                                                                                                                                                                                                                                                                                                                                                                                                                                                                                                                                                                                                      |

## E. List of features

In this part of the supplementary information, we enlist the features  $[x_1, x_2, \dots, x_n]$  in the input data used to characterize the compounds in the WEF - ANNs. In the NEF - ANNs, atomic radii and electronegativities per site, as well as the density of the compound, were not part of the input data. The subscripts appearing with average atomic radius  $r_i$ , electronegativity  $\chi_i$ , and local function  $f_{ij}$  refer to a site in the crystal compound. The average atomic radius per site,  $r_i$  is calculated as follows:

$$r_i = \sum r_{elem} s_{elem} \text{ (eq. 1)}$$

where  $r_{elem}$  refers to the atomic radius of the chemical element in the  $i$  - Wyckoff site, and  $s_{elem}$  to its occupation fraction. If the occupation fraction of all elements occupying the  $i$  - Wyckoff site does not sum one, this means that there are vacancies in the compound.

The number of features corresponding to geometric factors, as well as to packing factors, is calculated with the number of combinations formula:

$${}_k^n C = \frac{n!}{k!(n-k)!} \text{ (eq. 2)}$$

where  $n$  is the number of sites in the crystal compound and  $k$  is the number of elements in the set to form. From this formula, there are six different pairs of atomic radii when the crystal compounds are characterized with four sites (4S - ANNs). Similarly, there are fifteen different pairs of atomic radii when the crystal compounds are characterized with six sites (6S - ANNs). These different pairs corresponded to the different quotients in the geometric factors. To generate the 15 packing factors in the 4S - ANNs, the six different combinations previously calculated were first expressed in terms of a sum; i.e., there were six different sums. These different sums were used again with the number of combinations formula to calculate different pairs to generate the quotients corresponding to packing factors. This procedure was the same to generate the 105 packing factors in the 6S - ANNs. The local environment functions were calculated as follows:

$$f_{ij} = (\chi_i - \chi_j) \sum_{n=1}^{d_{ij[n] \leq R_c} \left[ \frac{1}{2} \left( \cos \frac{\pi d_{ij[n]}}{R_c} + 1 \right) \right] \exp \left[ - \left( \frac{d_{ij[n]}}{r_i^{norm} + r_j^{norm}} \right)^2 \right]} \text{ (eq. 3)}$$

The sum in the equation 2 is performed over all neighbor atoms located in the same  $j$  - Wyckoff site within a cutoff radius,  $R_c$ , equal to 25 Å.  $d_{ij[n]}$  stands for the distance between a neighbor atom and the central one, which is located in the  $i$  - Wyckoff site. The atomic radii of the species are normalized, which implies that the occupation fraction of each element in the  $i$  - Wyckoff site,  $s_{elem}$ , was considered:

$$r_i^{norm} = \frac{r_i}{\sum s_{elem}}$$



## E.1 Features in the 4S - WEF ANNs

### E.1.1 Average atomic radii and electronegativities per site

(This set of features was not used in the NEF - ANNs)

$$x_1: r_1$$

$$x_3: r_2$$

$$x_5: r_3$$

$$x_7: r_4$$

$$x_2: \chi_1$$

$$x_4: \chi_2$$

$$x_6: \chi_3$$

$$x_8: \chi_4$$

### E.1.2 Geometric factors

$$x_9: \frac{r_1}{r_2}$$

$$x_{11}: \frac{r_1}{r_4}$$

$$x_{13}: \frac{r_2}{r_4}$$

$$x_{10}: \frac{r_1}{r_3}$$

$$x_{12}: \frac{r_2}{r_3}$$

$$x_{14}: \frac{r_3}{r_4}$$

### E.1.3 Packing factors

$$x_{15}: \frac{r_1 + r_2}{r_1 + r_3}$$

$$x_{20}: \frac{r_1 + r_3}{r_1 + r_4}$$

$$x_{25}: \frac{r_1 + r_4}{r_2 + r_4}$$

$$x_{16}: \frac{r_1 + r_2}{r_1 + r_4}$$

$$x_{21}: \frac{r_1 + r_3}{r_2 + r_3}$$

$$x_{26}: \frac{r_1 + r_4}{r_3 + r_4}$$

$$x_{17}: \frac{r_1 + r_2}{r_2 + r_3}$$

$$x_{22}: \frac{r_1 + r_3}{r_2 + r_4}$$

$$x_{27}: \frac{r_2 + r_3}{r_2 + r_4}$$

$$x_{18}: \frac{r_1 + r_2}{r_2 + r_4}$$

$$x_{23}: \frac{r_1 + r_3}{r_3 + r_4}$$

$$x_{28}: \frac{r_2 + r_3}{r_3 + r_4}$$

$$x_{19}: \frac{r_1 + r_2}{r_3 + r_4}$$

$$x_{24}: \frac{r_1 + r_4}{r_2 + r_3}$$

$$x_{29}: \frac{r_2 + r_4}{r_3 + r_4}$$

### E.1.4 Local environment functions

$$x_{30}: f_{12}$$

$$x_{33}: f_{21}$$

$$x_{36}: f_{31}$$

$$x_{39}: f_{41}$$

$$x_{31}: f_{13}$$

$$x_{34}: f_{23}$$

$$x_{37}: f_{32}$$

$$x_{40}: f_{42}$$

$$x_{32}: f_{14}$$

$$x_{35}: f_{24}$$

$$x_{38}: f_{34}$$

$$x_{41}: f_{43}$$

### E.1.5 Density of the crystal 2 compound

(This feature was not used in the NEF - ANNs)

$$x_{42}: \rho_{\text{compound}}$$

## E.2 Features in the 6S - WEF ANNs

### E.2.1 Average atomic radii and electronegativities per site

(This set of features was not used in the NEF - ANNs)

|               |               |               |               |                  |                  |
|---------------|---------------|---------------|---------------|------------------|------------------|
| $x_1: r_1$    | $x_3: r_2$    | $x_5: r_3$    | $x_7: r_4$    | $x_9: r_5$       | $x_{11}: r_6$    |
| $x_2: \chi_1$ | $x_4: \chi_2$ | $x_6: \chi_3$ | $x_8: \chi_4$ | $x_{10}: \chi_5$ | $x_{12}: \chi_6$ |

### E.2.2 Geometric factors

|                           |                           |                           |
|---------------------------|---------------------------|---------------------------|
| $x_{13}: \frac{r_1}{r_2}$ | $x_{18}: \frac{r_2}{r_3}$ | $x_{23}: \frac{r_3}{r_5}$ |
| $x_{14}: \frac{r_1}{r_3}$ | $x_{19}: \frac{r_2}{r_4}$ | $x_{24}: \frac{r_3}{r_6}$ |
| $x_{15}: \frac{r_1}{r_4}$ | $x_{20}: \frac{r_2}{r_5}$ | $x_{25}: \frac{r_4}{r_5}$ |
| $x_{16}: \frac{r_1}{r_5}$ | $x_{21}: \frac{r_2}{r_6}$ | $x_{26}: \frac{r_4}{r_6}$ |
| $x_{17}: \frac{r_1}{r_6}$ | $x_{22}: \frac{r_3}{r_4}$ | $x_{27}: \frac{r_5}{r_6}$ |

### E.2.3 Packing factors

|                                       |                                       |                                       |                                       |
|---------------------------------------|---------------------------------------|---------------------------------------|---------------------------------------|
| $x_{28}: \frac{r_1 + r_2}{r_1 + r_3}$ | $x_{37}: \frac{r_1 + r_2}{r_3 + r_5}$ | $x_{46}: \frac{r_1 + r_3}{r_2 + r_4}$ | $x_{55}: \frac{r_1 + r_4}{r_1 + r_5}$ |
| $x_{29}: \frac{r_1 + r_2}{r_1 + r_4}$ | $x_{38}: \frac{r_1 + r_2}{r_3 + r_6}$ | $x_{47}: \frac{r_1 + r_3}{r_2 + r_5}$ | $x_{56}: \frac{r_1 + r_4}{r_1 + r_6}$ |
| $x_{30}: \frac{r_1 + r_2}{r_1 + r_5}$ | $x_{39}: \frac{r_1 + r_2}{r_4 + r_5}$ | $x_{48}: \frac{r_1 + r_3}{r_2 + r_6}$ | $x_{57}: \frac{r_1 + r_4}{r_2 + r_3}$ |
| $x_{31}: \frac{r_1 + r_2}{r_1 + r_6}$ | $x_{40}: \frac{r_1 + r_2}{r_4 + r_6}$ | $x_{49}: \frac{r_1 + r_3}{r_3 + r_4}$ | $x_{58}: \frac{r_1 + r_4}{r_2 + r_4}$ |
| $x_{32}: \frac{r_1 + r_2}{r_2 + r_3}$ | $x_{41}: \frac{r_1 + r_2}{r_5 + r_6}$ | $x_{50}: \frac{r_1 + r_3}{r_3 + r_5}$ | $x_{59}: \frac{r_1 + r_4}{r_2 + r_5}$ |
| $x_{33}: \frac{r_1 + r_2}{r_2 + r_4}$ | $x_{42}: \frac{r_1 + r_3}{r_1 + r_4}$ | $x_{51}: \frac{r_1 + r_3}{r_3 + r_6}$ | $x_{60}: \frac{r_1 + r_4}{r_2 + r_6}$ |
| $x_{34}: \frac{r_1 + r_2}{r_2 + r_5}$ | $x_{43}: \frac{r_1 + r_3}{r_1 + r_5}$ | $x_{52}: \frac{r_1 + r_3}{r_4 + r_5}$ | $x_{61}: \frac{r_1 + r_4}{r_3 + r_4}$ |
| $x_{35}: \frac{r_1 + r_2}{r_2 + r_6}$ | $x_{44}: \frac{r_1 + r_3}{r_1 + r_6}$ | $x_{53}: \frac{r_1 + r_3}{r_4 + r_6}$ | $x_{62}: \frac{r_1 + r_4}{r_3 + r_5}$ |
| $x_{36}: \frac{r_1 + r_2}{r_3 + r_4}$ | $x_{45}: \frac{r_1 + r_3}{r_2 + r_3}$ | $x_{54}: \frac{r_1 + r_3}{r_5 + r_6}$ | $x_{63}: \frac{r_1 + r_4}{r_3 + r_6}$ |

|                                  |                                  |                                   |                                   |
|----------------------------------|----------------------------------|-----------------------------------|-----------------------------------|
| $x_{64}:\frac{r_1+r_4}{r_4+r_5}$ | $x_{82}:\frac{r_1+r_6}{r_3+r_4}$ | $x_{100}:\frac{r_2+r_4}{r_3+r_5}$ | $x_{118}:\frac{r_3+r_4}{r_3+r_5}$ |
| $x_{65}:\frac{r_1+r_4}{r_4+r_6}$ | $x_{83}:\frac{r_1+r_6}{r_3+r_5}$ | $x_{101}:\frac{r_2+r_4}{r_3+r_6}$ | $x_{119}:\frac{r_3+r_4}{r_3+r_6}$ |
| $x_{66}:\frac{r_1+r_4}{r_5+r_6}$ | $x_{84}:\frac{r_1+r_6}{r_3+r_6}$ | $x_{102}:\frac{r_2+r_4}{r_4+r_5}$ | $x_{120}:\frac{r_3+r_4}{r_4+r_5}$ |
| $x_{67}:\frac{r_1+r_5}{r_1+r_6}$ | $x_{85}:\frac{r_1+r_6}{r_4+r_5}$ | $x_{103}:\frac{r_2+r_4}{r_4+r_6}$ | $x_{121}:\frac{r_3+r_4}{r_4+r_6}$ |
| $x_{68}:\frac{r_1+r_5}{r_2+r_3}$ | $x_{86}:\frac{r_1+r_6}{r_4+r_6}$ | $x_{104}:\frac{r_2+r_4}{r_5+r_6}$ | $x_{122}:\frac{r_3+r_4}{r_5+r_6}$ |
| $x_{69}:\frac{r_1+r_5}{r_2+r_4}$ | $x_{87}:\frac{r_1+r_6}{r_5+r_6}$ | $x_{105}:\frac{r_2+r_5}{r_2+r_6}$ | $x_{123}:\frac{r_3+r_5}{r_3+r_6}$ |
| $x_{70}:\frac{r_1+r_5}{r_2+r_5}$ | $x_{88}:\frac{r_2+r_3}{r_2+r_4}$ | $x_{106}:\frac{r_2+r_5}{r_3+r_4}$ | $x_{124}:\frac{r_3+r_5}{r_4+r_5}$ |
| $x_{71}:\frac{r_1+r_5}{r_2+r_6}$ | $x_{89}:\frac{r_2+r_3}{r_2+r_5}$ | $x_{107}:\frac{r_2+r_5}{r_3+r_5}$ | $x_{125}:\frac{r_3+r_5}{r_4+r_6}$ |
| $x_{72}:\frac{r_1+r_5}{r_3+r_4}$ | $x_{90}:\frac{r_2+r_3}{r_2+r_6}$ | $x_{108}:\frac{r_2+r_5}{r_3+r_6}$ | $x_{126}:\frac{r_3+r_5}{r_5+r_6}$ |
| $x_{73}:\frac{r_1+r_5}{r_3+r_5}$ | $x_{91}:\frac{r_2+r_3}{r_3+r_4}$ | $x_{109}:\frac{r_2+r_5}{r_4+r_5}$ | $x_{127}:\frac{r_3+r_6}{r_4+r_5}$ |
| $x_{74}:\frac{r_1+r_5}{r_3+r_6}$ | $x_{92}:\frac{r_2+r_3}{r_3+r_5}$ | $x_{110}:\frac{r_2+r_5}{r_4+r_6}$ | $x_{128}:\frac{r_3+r_6}{r_4+r_6}$ |
| $x_{75}:\frac{r_1+r_5}{r_4+r_5}$ | $x_{93}:\frac{r_2+r_3}{r_3+r_6}$ | $x_{111}:\frac{r_2+r_5}{r_5+r_6}$ | $x_{129}:\frac{r_3+r_6}{r_5+r_6}$ |
| $x_{76}:\frac{r_1+r_5}{r_4+r_6}$ | $x_{94}:\frac{r_2+r_3}{r_4+r_5}$ | $x_{112}:\frac{r_2+r_6}{r_3+r_4}$ | $x_{130}:\frac{r_4+r_5}{r_4+r_6}$ |
| $x_{77}:\frac{r_1+r_5}{r_5+r_6}$ | $x_{95}:\frac{r_2+r_3}{r_4+r_6}$ | $x_{113}:\frac{r_2+r_6}{r_3+r_5}$ | $x_{131}:\frac{r_4+r_5}{r_5+r_6}$ |
| $x_{78}:\frac{r_1+r_6}{r_2+r_3}$ | $x_{96}:\frac{r_2+r_3}{r_5+r_6}$ | $x_{114}:\frac{r_2+r_6}{r_3+r_6}$ | $x_{132}:\frac{r_4+r_6}{r_5+r_6}$ |
| $x_{79}:\frac{r_1+r_6}{r_2+r_4}$ | $x_{97}:\frac{r_2+r_4}{r_2+r_5}$ | $x_{115}:\frac{r_2+r_6}{r_4+r_5}$ |                                   |
| $x_{80}:\frac{r_1+r_6}{r_2+r_5}$ | $x_{98}:\frac{r_2+r_4}{r_2+r_6}$ | $x_{116}:\frac{r_2+r_6}{r_4+r_6}$ |                                   |
| $x_{81}:\frac{r_1+r_6}{r_2+r_6}$ | $x_{99}:\frac{r_2+r_4}{r_3+r_4}$ | $x_{117}:\frac{r_2+r_6}{r_5+r_6}$ |                                   |

### E.2.4 Local environment functions

|                  |                  |                  |                  |                  |                  |
|------------------|------------------|------------------|------------------|------------------|------------------|
| $x_{133}:f_{12}$ | $x_{138}:f_{21}$ | $x_{143}:f_{31}$ | $x_{148}:f_{41}$ | $x_{153}:f_{51}$ | $x_{158}:f_{61}$ |
| $x_{134}:f_{13}$ | $x_{139}:f_{23}$ | $x_{144}:f_{32}$ | $x_{149}:f_{42}$ | $x_{154}:f_{52}$ | $x_{159}:f_{62}$ |
| $x_{135}:f_{14}$ | $x_{140}:f_{24}$ | $x_{145}:f_{34}$ | $x_{150}:f_{43}$ | $x_{155}:f_{53}$ | $x_{160}:f_{63}$ |
| $x_{136}:f_{15}$ | $x_{141}:f_{25}$ | $x_{146}:f_{35}$ | $x_{151}:f_{45}$ | $x_{156}:f_{54}$ | $x_{161}:f_{64}$ |
| $x_{137}:f_{16}$ | $x_{142}:f_{26}$ | $x_{147}:f_{36}$ | $x_{152}:f_{46}$ | $x_{157}:f_{56}$ | $x_{162}:f_{65}$ |

### E.2.5 Density of the crystal compound

(This feature was not used in the NEF - ANNs)

$x_{42}:\rho_{compound}$
